# Supplementary material for: Marine Depsipeptide Nobilamide I Inhibits Cancer Cell Motility and Tumorigenicity via Suppressing Epithelial–Mesenchymal Transition and MMP2/9 Expression
Source: PubMed Central journal article supplement — ACS Omega. 2022 Jan 3;7(2):1722–32. doi: 10.1021/acsomega.1c04520 (PMC8771697; doi:10.1021/acsomega.1c04520), 2022-01-03
Supplement: ao1c04520_si_001.pdf [file ao1c04520_si_001.pdf]

*Supporting Information for*

# **The Marine Depsipeptide Nobilamide I Inhibits Cancer Cell Motility and Tumorigenicity via Suppressing Epithelial-Mesenchymal Transition and MMP2/9 Expression**

*Tu Cam Le<sup>†,1</sup>, Sultan Pulat<sup>‡,1</sup>, Jihye Lee<sup>§, 1,a</sup>, Geum Jin Kim<sup>⊥,b</sup>, Haerin Kim<sup>||</sup>, Eun-Young Lee<sup>§</sup>, Prima F. Hillman<sup>§</sup>, Hyukjae Choi<sup>⊥,b</sup>, Inho Yang<sup>▽</sup>, Dong-Chan Oh<sup>○</sup>, Hangun Kim<sup>‡,\*</sup>, Sang-Jip Nam<sup>§,\*</sup>, William Fenical<sup>#,\*</sup>*

<sup>†</sup>College of Pharmacy, Hong Bang International University, Hoa Binh, Hoa Thanh Ward, Tan Phu District, Ho Chi Minh City, 72006, Vietnam

<sup>‡</sup>College of Pharmacy, Sunchon National University, 255 Jungang-ro, Sunchon-si, Jeonnam 57922, Republic of Korea

<sup>§</sup>Department of Chemistry and Nanoscience, Ewha Womans University, 52, Ewhayeodae-gil, Seodaemun-gu, Seoul, 03760, Republic of Korea

<sup>⊥</sup>College of Pharmacy, Yeungnam University, 280, Daehak-ro, Gyeongsan-si, Gyeongsangbukdo 38541, Republic of Korea

---

<sup>a</sup> Laboratories of Marine New Drugs, REDONE Seoul, 5, Gasan digital 1-ro, Geumcheon-gu, Seoul 08594, Republic of Korea

<sup>b</sup> Research Institute of Cell Culture, Yeungnam University, 280, Daehak-ro, Gyeongsan-si, Gyeongsangbukdo 38541, Republic of Korea

‖The Graduate School of Industrial Pharmaceutical Sciences, Ewha Womans University, 52, Ewhayeodae-gil, Seodaemun-gu, Seoul 03760, Republic of Korea

▽Department of Convergence Study on the Ocean Science and Technology, Korea Maritime and Ocean University, 727, Taejong-ro, Yeongdo-gu, Busan 49112, Republic of Korea

°Natural Products Research Institute, College of Pharmacy, Seoul National University, 1, Gwanak-ro, Gwanak-gu, Seoul 08826, Republic of Korea

#Center for Marine Biotechnology and Biomedicine, Scripps Institution of Oceanography, University of California-San Diego, La Jolla, CA 92093-0204, USA

## List of Contents

|                                                                                                                                                     |            |
|-----------------------------------------------------------------------------------------------------------------------------------------------------|------------|
| <b>Figure S1.</b> $^1\text{H}$ NMR spectrum (300 MHz, $\text{DMSO-}d_6$ ) of nobilamide I ( <b>1</b> ) .....                                        | <b>S4</b>  |
| <b>Figure S2.</b> $^{13}\text{C}$ NMR spectrum (175 MHz, $\text{DMSO-}d_6$ ) of nobilamide I ( <b>1</b> ) .....                                     | <b>S5</b>  |
| <b>Figure S3.</b> COSY spectrum (500 MHz, $\text{DMSO-}d_6$ ) of nobilamide I ( <b>1</b> ) .....                                                    | <b>S6</b>  |
| <b>Figure S4.</b> HSQC spectrum (500 MHz, $\text{DMSO-}d_6$ ) of nobilamide I ( <b>1</b> ) .....                                                    | <b>S7</b>  |
| <b>Figure S5.</b> HMBC spectrum (500 MHz, $\text{DMSO-}d_6$ ) of nobilamide I ( <b>1</b> ) .....                                                    | <b>S8</b>  |
| <b>Figure S6.</b> ROESY spectrum (500 MHz, $\text{DMSO-}d_6$ ) of nobilamide I ( <b>1</b> ) .....                                                   | <b>S9</b>  |
| <b>Figure S7.</b> $^1\text{H}$ NMR spectrum (300 MHz, $\text{DMSO-}d_6$ ) of A-3302-B ( <b>2</b> ) .....                                            | <b>S10</b> |
| <b>Figure S8.</b> LC-MS chromatograms of L-FDLA derivatives of with authentic standard amino acids (blue) and nobilamide I ( <b>1</b> ) (red) ..... | <b>S11</b> |
| <b>Table S1.</b> LC/MS analysis of $^1\text{L}$ -FDAA derivatives with nobilamide I ( <b>1</b> ) and standard amino acids .....                     | <b>S12</b> |

**Figure S1.**  $^1\text{H}$  NMR spectrum (300 MHz,  $\text{DMSO-}d_6$ ) of nobilamide I (**1**)

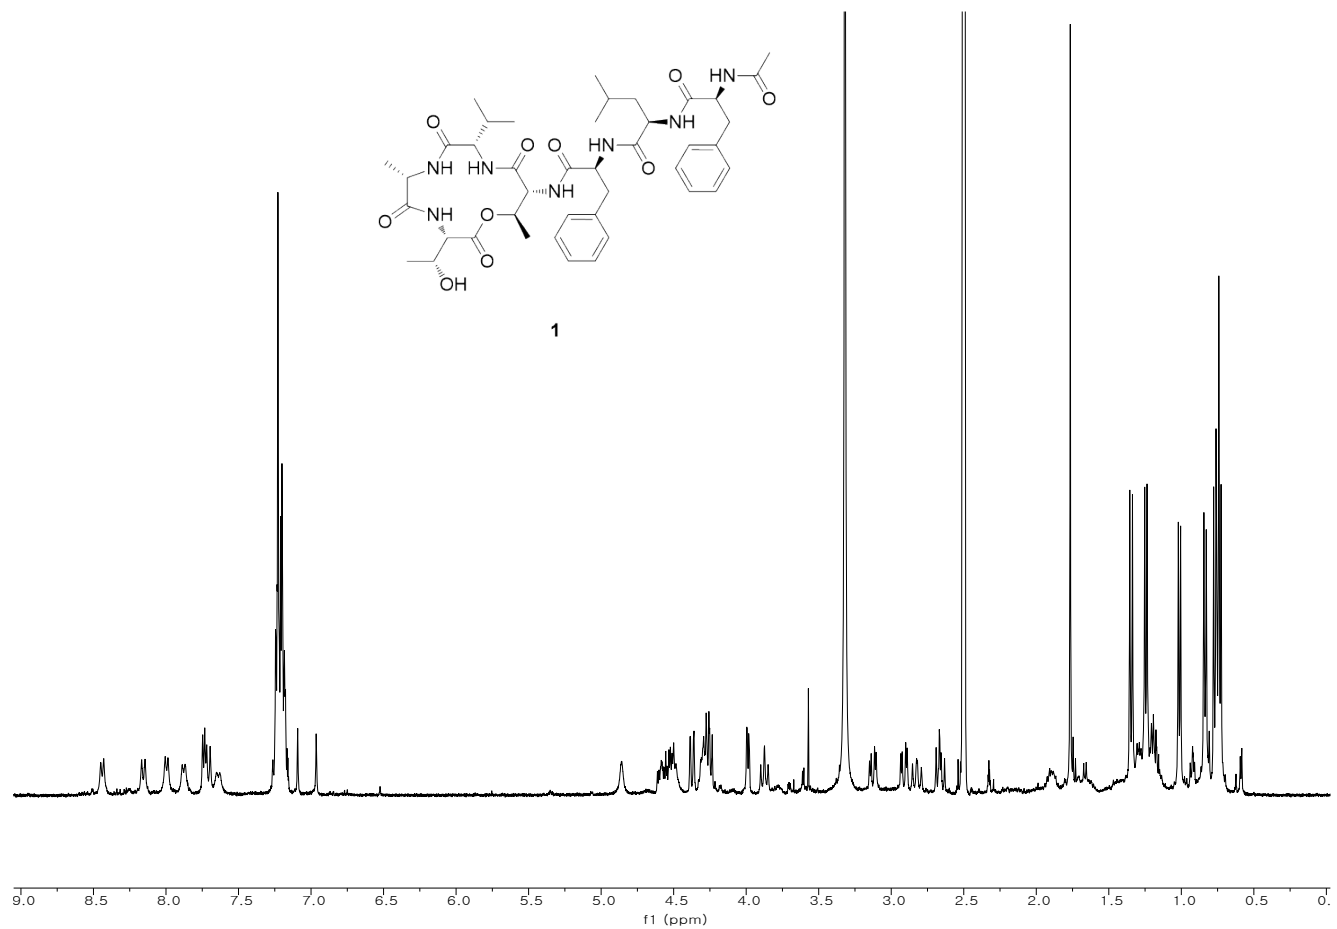



**Figure S3.** COSY spectrum (500 MHz, DMSO-*d*<sub>6</sub>) of nobilamide I (**1**)

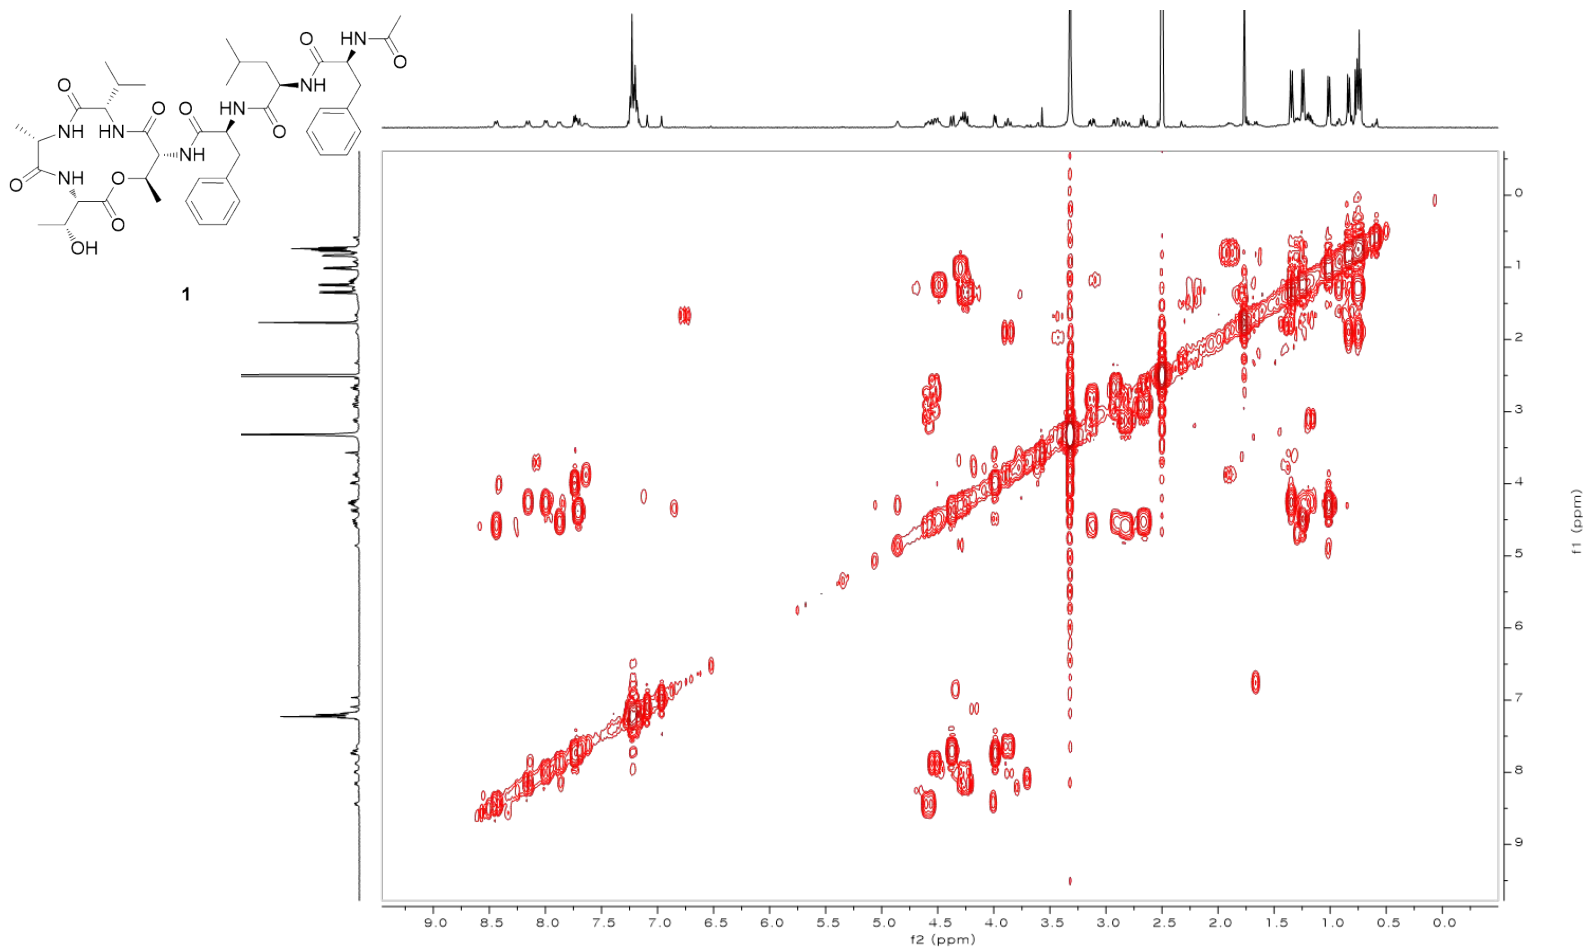

**Figure S4.** HSQC spectrum (500 MHz, DMSO-*d*<sub>6</sub>) of nobilamide I (**1**)

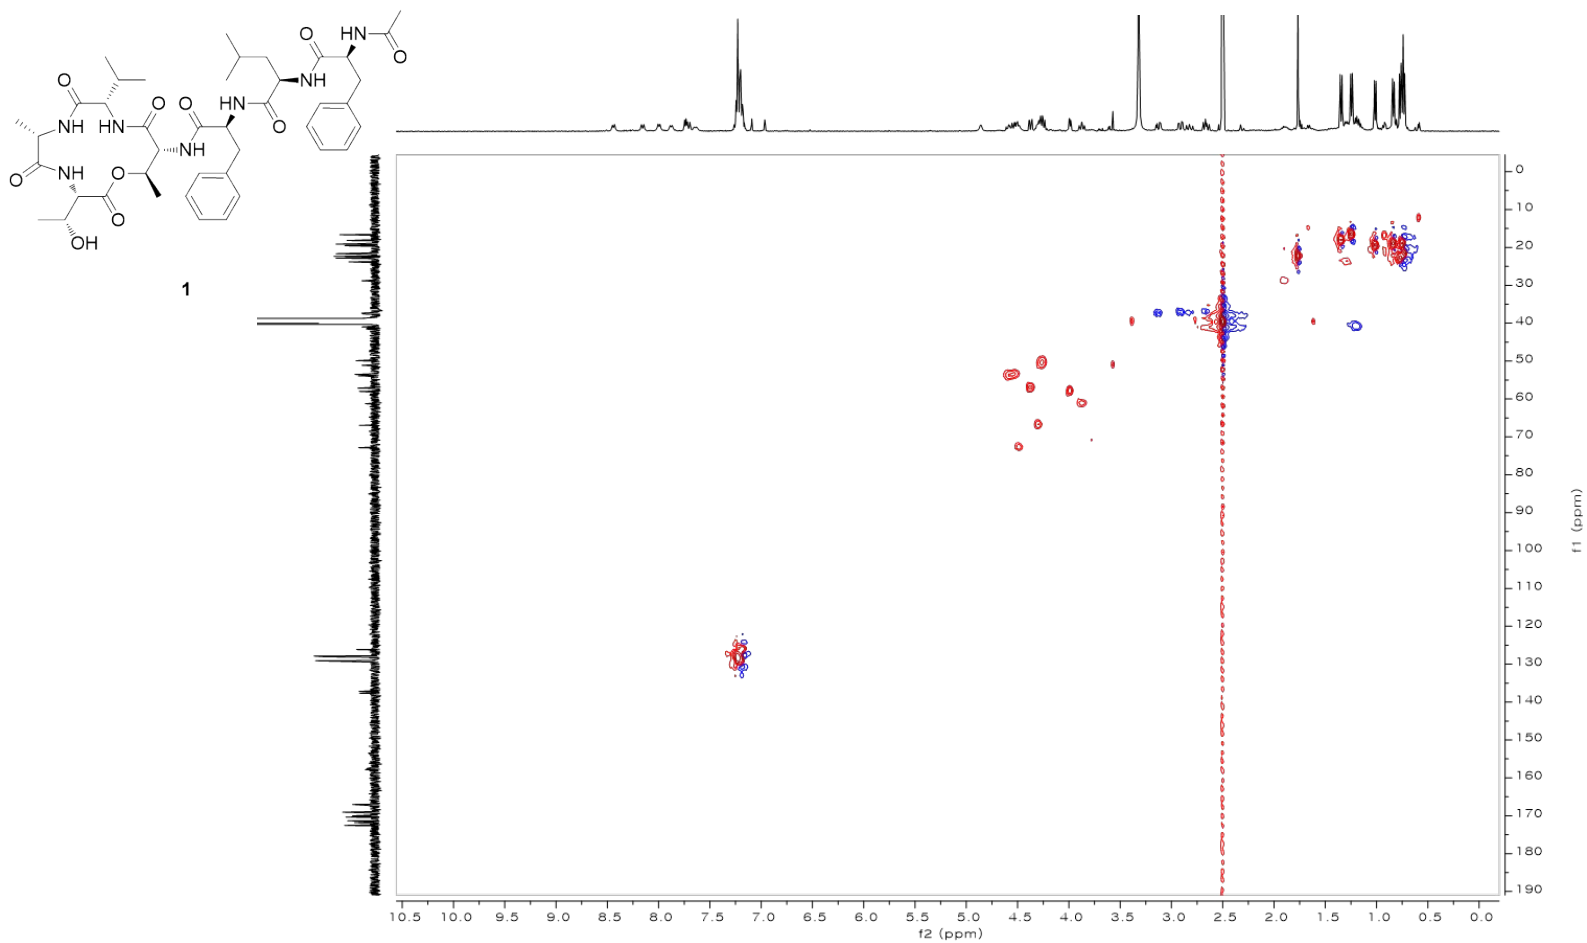

**Figure S5.** HMBC spectrum (500 MHz, DMSO-*d*<sub>6</sub>) of nobilamide I (**1**)

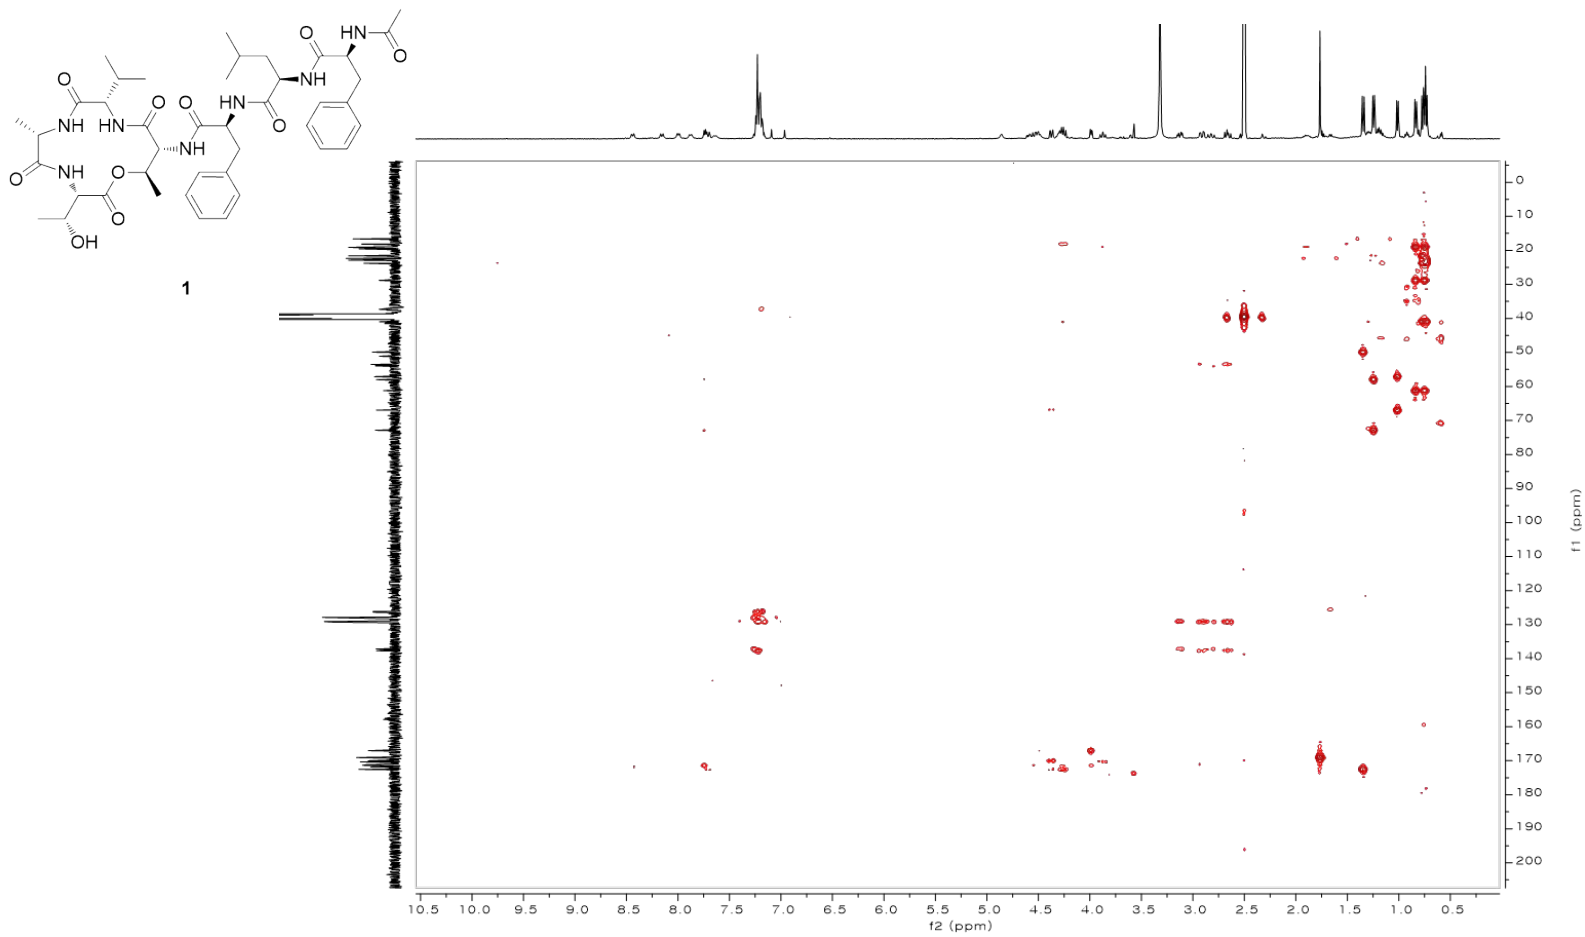



**Figure S6.** ROESY spectrum (500 MHz, DMSO- $d_6$ ) of nobilamide I (**1**)

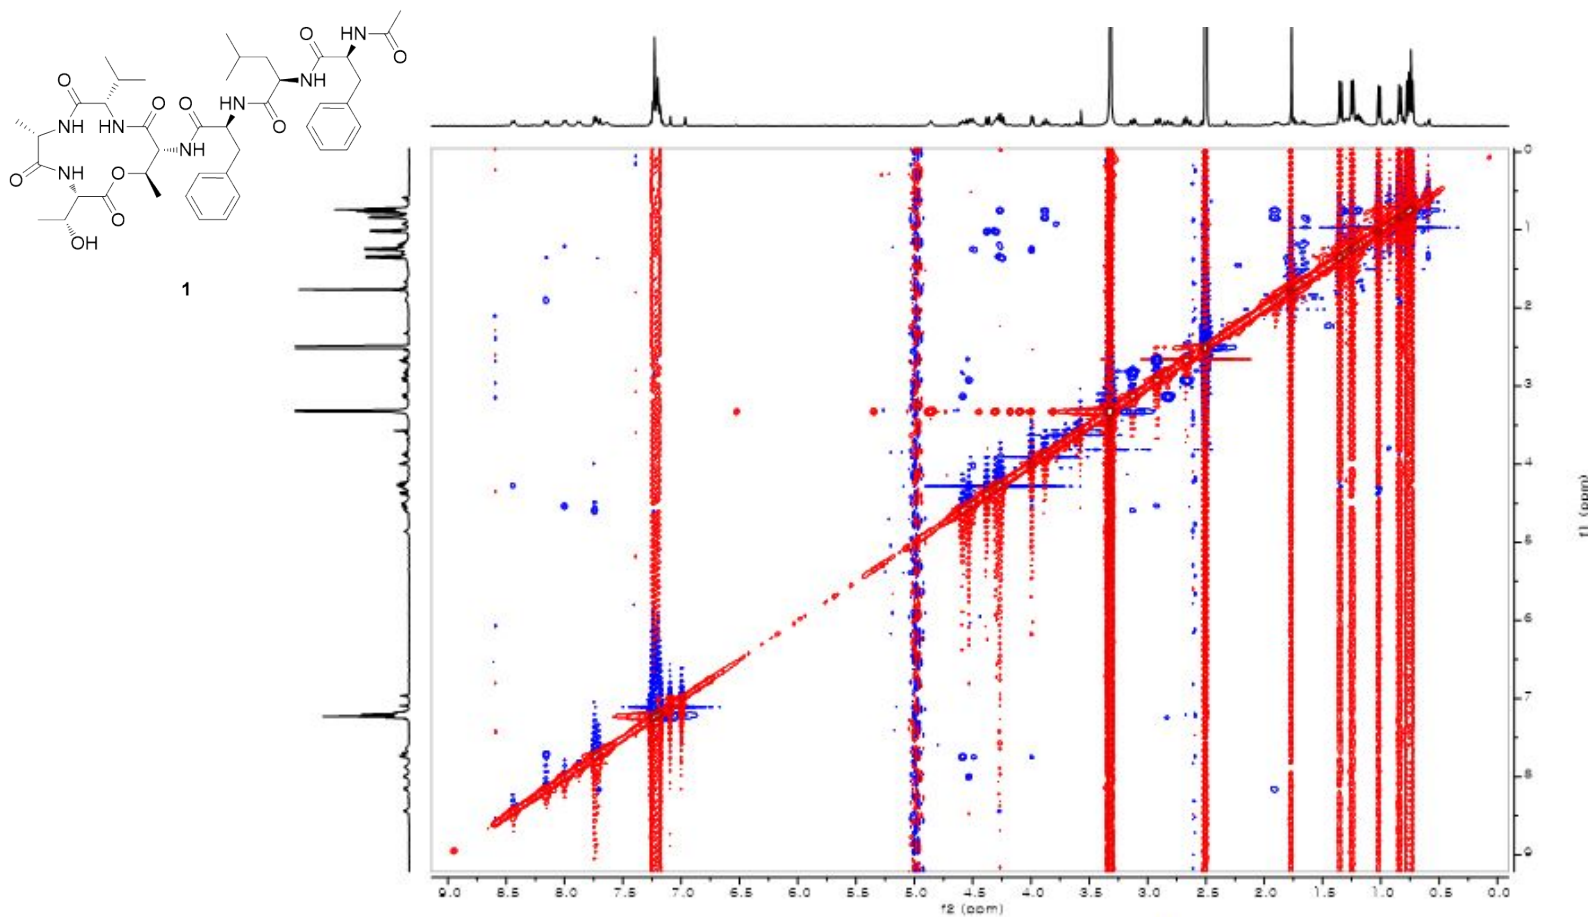

**Figure S7.**  $^1\text{H}$  NMR spectrum (300 MHz,  $\text{DMSO-}d_6$ ) of A-3302-B (**2**)

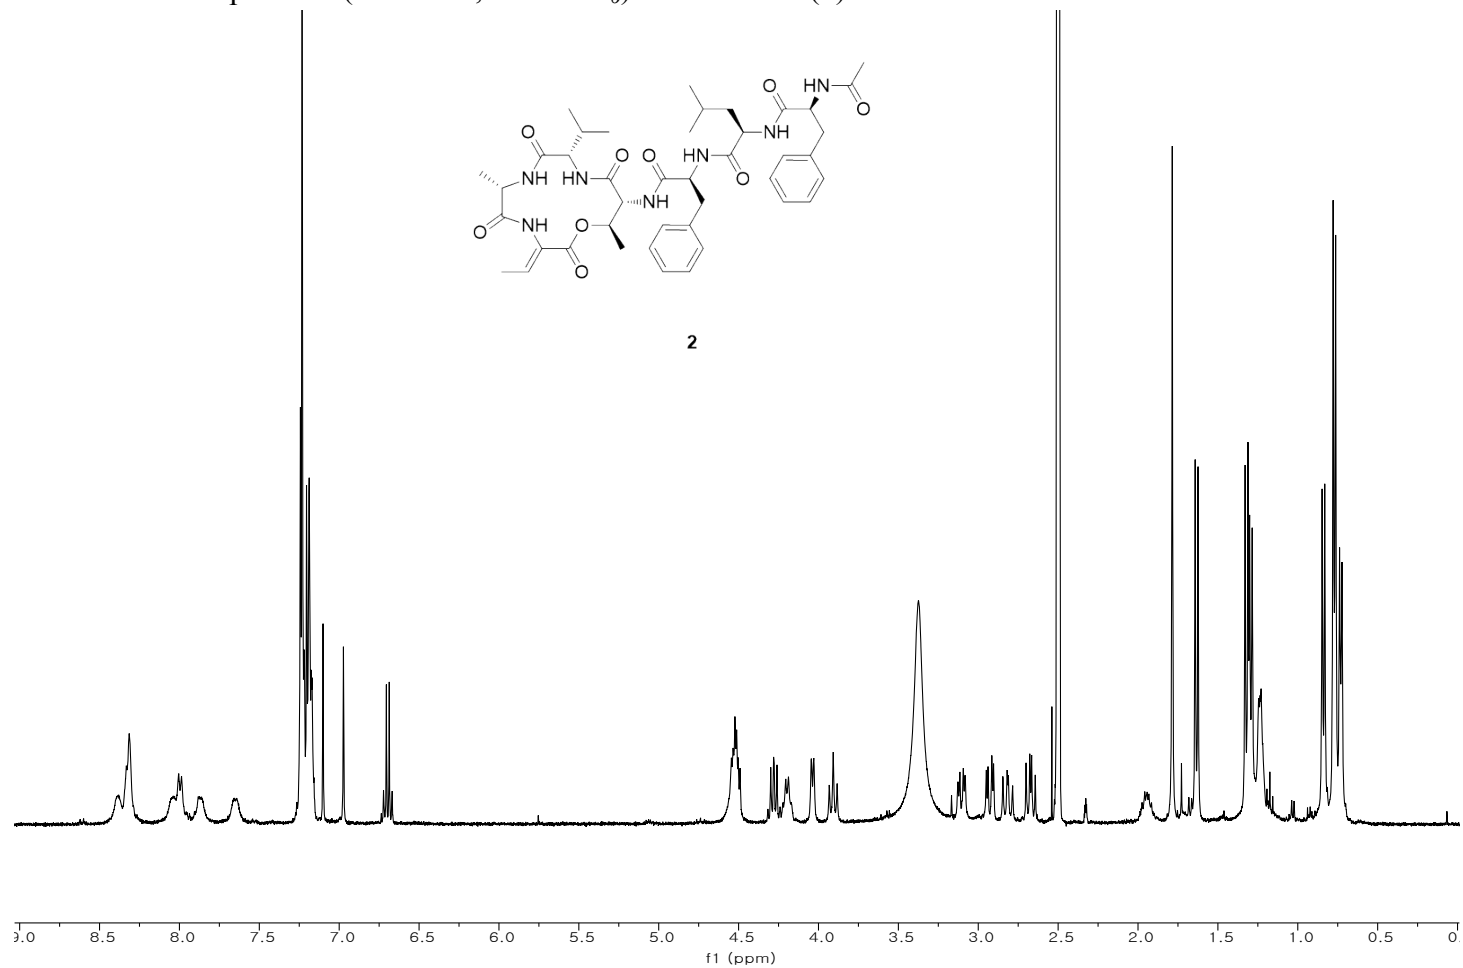

**Figure S8.** LC-MS chromatograms of L-FDLA derivatives of with authentic standard amino acids (blue) and nobilamide I (1) (red)

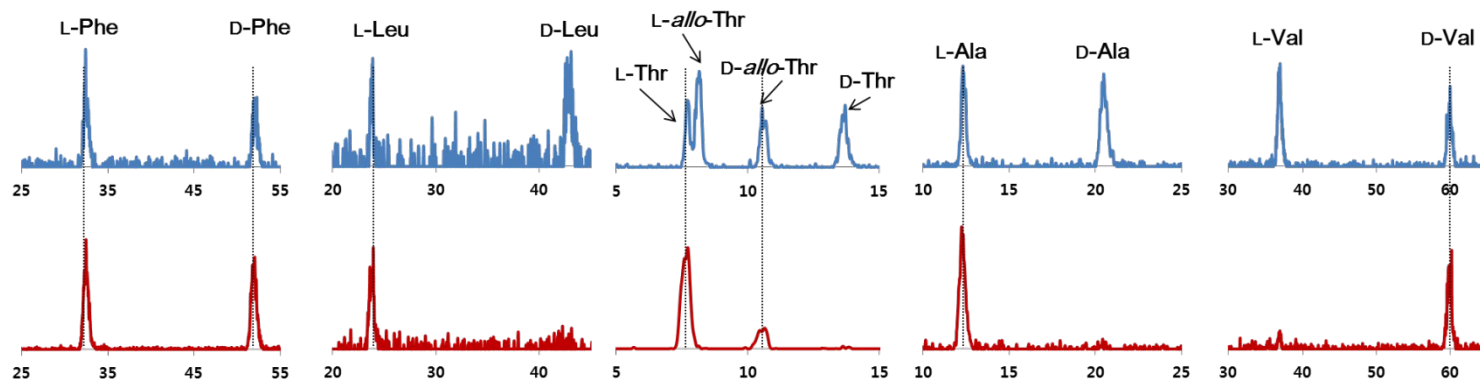

**Table S1.** LC/MS analysis of <sub>L</sub>-FDAA derivatives with nobilamide I (**1**) and standard amino acids

| Amino acids (AA)          | <i>m/z</i> range | Retention time (min) |                           |                           |             | Absolute configurations |
|---------------------------|------------------|----------------------|---------------------------|---------------------------|-------------|-------------------------|
|                           |                  | L-AA-L-FDAA          | L- <i>allo</i> -AA-L-FDAA | D- <i>allo</i> -AA-L-FDAA | D-AA-L-FDAA |                         |
| Standards                 | Phe              | 415-417              | 32.4                      |                           | 52.0        |                         |
|                           | Leu              | 381-383              | 36.8                      |                           | 59.9        |                         |
|                           | Thr              | 369-371              | 7.7                       | 8.2                       | 10.5        | 13.7                    |
|                           | Ala              | 339-341              | 12.3                      |                           |             | 20.5                    |
|                           | Val              | 367-369              | 23.9                      |                           |             | 42.9                    |
| Nobilamide I ( <b>1</b> ) | Phe              | 415-417              | 32.4                      |                           | 52.0        | L/D                     |
|                           | Leu              | 381-383              |                           |                           | 59.9        | D                       |
|                           | Thr              | 369-371              | 7.7                       |                           | 10.5        | L-/D- <i>allo</i>       |
|                           | Ala              | 339-341              | 12.3                      |                           |             | L                       |
|                           | Val              | 367-369              | 23.9                      |                           |             | L                       |
